# Supplementary material
Source: PubMed Central journal article supplement (PMC5866577)
Supplement: pnas.201718844SI.pdf [file pnas.201718844SI.pdf]

# Supporting Information

Tsui et al. 10.1073/pnas.1718844115

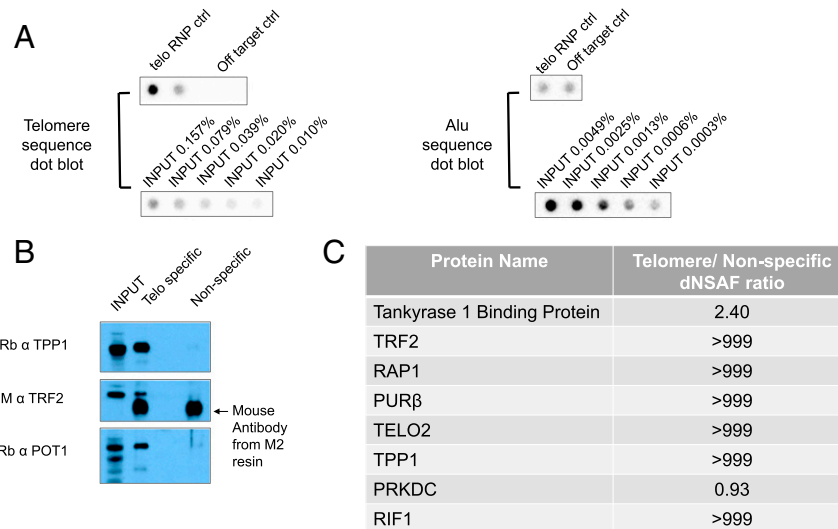

**Fig. S1.** (A) dCas9-3×FLAG is bound to either telomere-specific or nontargeting sgRNA and incubated with formaldehyde-crosslinked and sheared HeLa chromatin. dCas9 and associated chromatin is eluted off beads with 3×FLAG peptide. Specific and nontargeting DNA enrichment is assessed with telomere DNA-specific and Alu DNA-specific radioactive probes, respectively. dCas9-3×FLAG RNP loaded with telomere guide RNA specifically pulls down telomere-sequence DNA, while off-target dCas9-3×FLAG RNP does not. Both pulldowns have similar amounts of nonspecific Alu DNA contamination. (B) Western blot analysis of other shelterin subunits using protein samples from telomere-specific and nontargeting dCas9-3×FLAG pulldown. Telomere-specific dCas9-3×FLAG pulldown can specifically enrich for shelterin components such as TPP1, TRF2, and POT1, while nontargeting guide RNA-loaded dCas9-3×FLAG has no discernible enrichment. (C) Table of proteins associated with telomeres identified via MudPIT mass spectrometry. TPP1, RAP1, and RIF1 were identified when samples were digested with AspN and GluC enzymes; the rest were found with a trypsin and LysC combination.

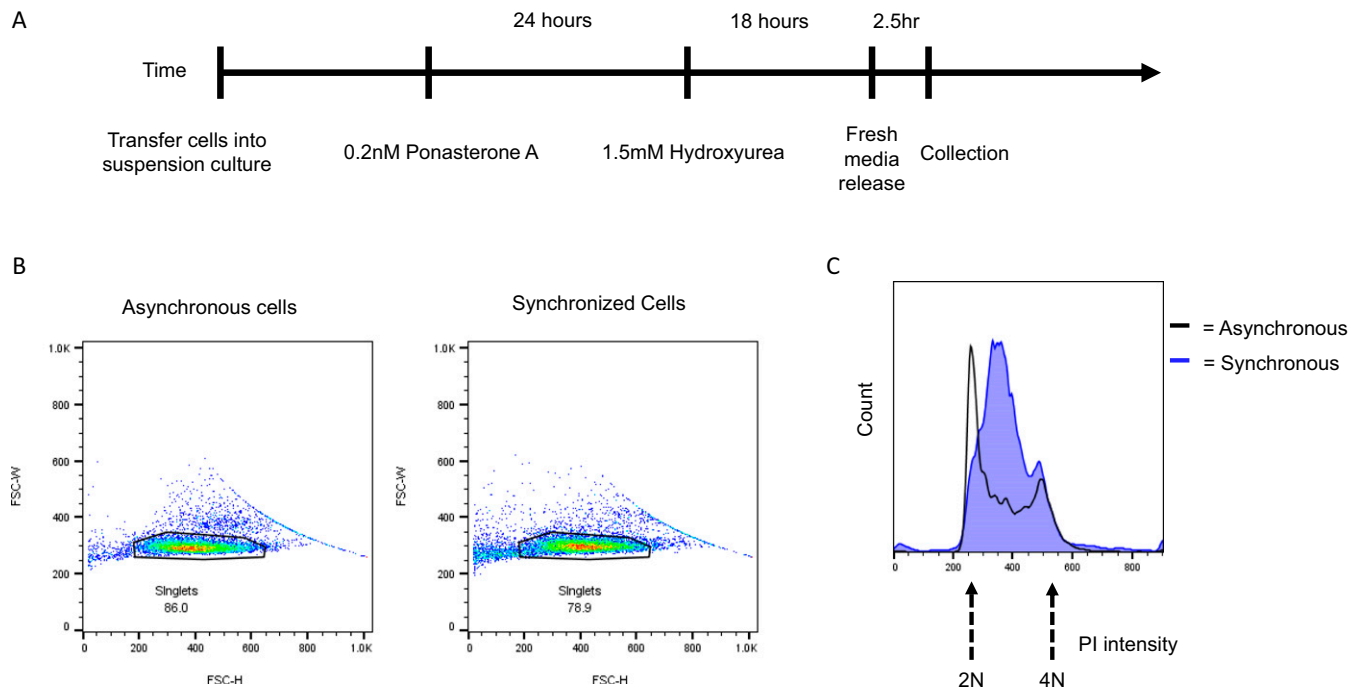

**Fig. S2.** S2 cells can be properly synchronized in suspension cultures without greatly affecting cell viability. (A) Synchronization scheme for S2 cells in suspension culture. (B) Comparison of the forward scatter width (FSC-W) and forward scatter height (FSC-H) of sorted S2 cells to distinguish the proportion of viable singlet cells. (C) Synchronized and asynchronous S2 cells are stained with PI, and the intensity is measured by the flow cytometer.





**Table S4. *Drosophila* RNAi primers**

| Target            | Forward (5' → 3')                             | Reverse (5' → 3')                            |
|-------------------|-----------------------------------------------|----------------------------------------------|
| BIN1              | TTAATACGACTCACTATAGGGAGA ATGGCCAACGTGGAATCTAT | TTAATACGACTCACTATAGGGAGA GTACGGACGCTGGCGCC   |
| BUBR1             | TTAATACGACTCACTATAGGGAGA GGCCTGGAATAAGGCAAATG | TTAATACGACTCACTATAGGGAGA CCAACAACCTCTCTGGCT  |
| CP190             | TTAATACGACTCACTATAGGGAGA AAGCCTGCTATCGCC      | TTAATACGACTCACTATAGGGAGA CGCCTTCTGTTGTGCT    |
| CG3262            | TTAATACGACTCACTATAGGGAGA GGAAAGGGTGGTGTGGAA   | TTAATACGACTCACTATAGGGAGA TTGCGCGGTAGAGAACCTT |
| CG8771            | TTAATACGACTCACTATAGGGAGA CAACCGGGTGTACCAG     | TTAATACGACTCACTATAGGGAGA CACGAACTTGGCTGTTTC  |
| VIG2              | TTAATACGACTCACTATAGGGAGA CAATCGTGACAACAGGGGA  | TTAATACGACTCACTATAGGGAGA TCCGTCATTGCGGAAGCC  |
| CG12608           | TTAATACGACTCACTATAGGGAGA CGCGGAAACAGTCGCAG    | TTAATACGACTCACTATAGGGAGA AGGCGATGGCCTTGAC    |
| SYNCRIP Isoform C | TTAATACGACTCACTATAGGGAGA GGTCAGCGTAAATACGGC   | TTAATACGACTCACTATAGGGAGA TTGTTTGCTCATCCGGCTC |
| DBP21E2           | TTAATACGACTCACTATAGGGAGA GGTGAGGAACCTCCAGCAGG | TTAATACGACTCACTATAGGGAGA CAGGATCATCTGGGTGCC  |
| BAP60             | TTAATACGACTCACTATAGGGAGA CATCGCTACTGCAAGCGC   | TTAATACGACTCACTATAGGGAGA GCTTGAACCTGCAGCGGC  |
| ROX8              | TTAATACGACTCACTATAGGGAGA CCAGTCCCAGCAATCAG    | TTAATACGACTCACTATAGGGAGA ACCTCGCTGTTGTGCG    |
| CDC5              | TTAATACGACTCACTATAGGGAGA CTCGCAAGTTGAAGCCCG   | TTAATACGACTCACTATAGGGAGA GCTAGCAAAGCATCCGTCG |
| IRBP              | TTAATACGACTCACTATAGGGAGA TGTACGAGCAGTCAGGGA   | TTAATACGACTCACTATAGGGAGA ACAAGCGCTTCGATCCG   |
| NAP1              | TTAATACGACTCACTATAGGGAGA AGGACGTCTACAAGCTGGA  | TTAATACGACTCACTATAGGGAGA TCTGCTGGGAGTCGTCG   |
| BRM               | TTAATACGACTCACTATAGGGAGA GGGACAGCCATTGCCA     | TTAATACGACTCACTATAGGGAGA TCGTTCAGCCTCTAGCTTC |
| CKIIalpha         | TTAATACGACTCACTATAGGGAGA ACGACCACGGAAAAGTGC   | TTAATACGACTCACTATAGGGAGA ATCGCTTTCGTGAGTGACG |
| ROW               | TTAATACGACTCACTATAGGGAGA AACGGCGACTCCTTCG     | TTAATACGACTCACTATAGGGAGA GGCCGCTTGTAGGTGG    |
| VIG               | TTAATACGACTCACTATAGGGAGA AGGAAGCGGAGTTCCG     | TTAATACGACTCACTATAGGGAGA TGGGCCACGGTTTCCAC   |
| CG31357           | TAATACGACTCACTATAG G TGCATGGGATACTATGAA       | TAATACGACTCACTATAG G TGCAGTATGGCAACTTGAG     |
| CG3295            | TAATACGACTCACTATAG G AAGTCTTGGCATGTGGAAC      | TAATACGACTCACTATAG G ACCAACACCAGTCCCTCGAAC   |
| EBI               | TAATACGACTCACTATAG G GTTCTTTCAGATCAGCGGG      | TAATACGACTCACTATAG G GTTCTTGTGTTTCCGCCAAT    |
| CG7611            | TAATACGACTCACTATAG G GCAAGTGTATCAACTGCCA      | TAATACGACTCACTATAG G AATTGAGTGTGGAACCCCTCG   |
| RanBPM            | TAATACGACTCACTATAG G CCTTTFGATTTGGCGTGATTT    | TAATACGACTCACTATAG G TTCATGTTTGGCCGAATGTGT   |
| Smu1              | TAATACGACTCACTATAG G GGTTCCTTGAGGTGTGGAA      | TAATACGACTCACTATAG G CCAAACCTTTACTGTGCCGT    |
| Mahj              | TAATACGACTCACTATAG G TTGTGGTCTTGCTATCGCTG     | TAATACGACTCACTATAG G TACATTGGCCTTGTGCATGT    |
| Mxc               | TAATACGACTCACTATAG G CCGCAAACACCGCTTATTTAT    | TAATACGACTCACTATAG G TACCCACTCGTGTTCACCA     |
| Control           | TAATACGACTCACTATAG GTTAAAATTTCGGTTAAATTT      | TAATACGACTCACTATAG GTGTGGTGGTTACGGCGCAGC     |

## Other Supporting Information Files

[Dataset S1 \(XLSX\)](#)

[Dataset S2 \(XLSX\)](#)
